# Supplementary material for: Innate cell markers that predict anti-HIV neutralizing antibody titers in vaccinated macaques
Source: PubMed Central journal article supplement (PMC9588994; doi:10.1016/j.xcrm.2022.100751), 2022-09-26
Supplement: mmc1.pdf [file mmc1.pdf]

**Cell Reports Medicine, Volume 3**

**Supplemental information**

**Innate cell markers that predict anti-HIV**

**neutralizing antibody titers**

**in vaccinated macaques**

**Matthieu Van Tilbeurgh, Pauline Maisonnasse, Jean-Louis Palgen, Monica Tolazzi, Yoann Aldon, Nathalie Dereuddre-Bosquet, Mariangela Cavarelli, Anne-Sophie Beignon, Ernesto Marcos-Lopez, Anne-Sophie Gallouet, Emmanuel Gilson, Gabriel Ozorowski, Andrew B. Ward, Ilja Bontjer, Paul F. McKay, Robin J. Shattock, Gabriella Scarlatti, Rogier W. Sanders, and Roger Le Grand**

# Innate cell markers that predict anti-HIV neutralizing antibody titers in vaccinated macaques

## Supplementary materials

**Authors:** Matthieu Van Tilbeurgh<sup>1</sup>, Pauline Maisonnasse<sup>1</sup>, Jean-Louis Palgen<sup>1</sup>, Monica Tolazzi<sup>2</sup>, Yoann Aldon<sup>3</sup>, Nathalie Dereuddre-Bosquet<sup>1</sup>, Mariangela Cavarelli<sup>1</sup>, Anne-Sophie Beignon<sup>1</sup>, Ernesto Marcos-Lopez<sup>1</sup>, Anne-Sophie Gallouet<sup>1</sup>, Emmanuel Gilson<sup>4</sup>, Gabriel Ozorowski<sup>5</sup>, Andrew B. Ward<sup>5</sup>, Ilja Bontjer<sup>6</sup>, Paul F. McKay<sup>3</sup>, Robin J. Shattock<sup>3</sup>, Gabriella Scarlatti<sup>2</sup>, Rogier W. Sanders<sup>6,7</sup>, and Roger Le Grand<sup>1\*</sup>.

**Affiliations:**

<sup>1</sup> Université Paris-Saclay, Inserm, CEA, Center for Immunology of Viral, Auto-immune, Hematological and Bacterial diseases » (IMVA-HB/IDMIT), 92265 Fontenay-aux-Roses & 94270 Le Kremlin-Bicêtre, France

<sup>2</sup> Viral Evolution and Transmission Unit, Division of Immunology, Transplantation and Infectious Diseases, IRCCS Ospedale San Raffaele, 20132 Milan, Italy

<sup>3</sup> Imperial College London, Faculty of Medicine, Department of Infectious Disease, London, United Kingdom.

<sup>4</sup> Life & Soft, 28 rue de la Redoute, 92260 Fontenay-aux-Roses, France

<sup>5</sup> Department of Integrative Structural and Computational Biology, The Scripps Research Institute, La Jolla, CA 92037, USA.

<sup>6</sup> Department of Medical Microbiology and Infection Prevention, Amsterdam University Medical Centers, Location AMC, University of Amsterdam, 1105 AZ Amsterdam, the Netherlands

<sup>7</sup> Department of Microbiology and Immunology, Weill Medical College of Cornell University, New York, NY 10021, USA

\* Corresponding author: roger.le-grand@cea.fr

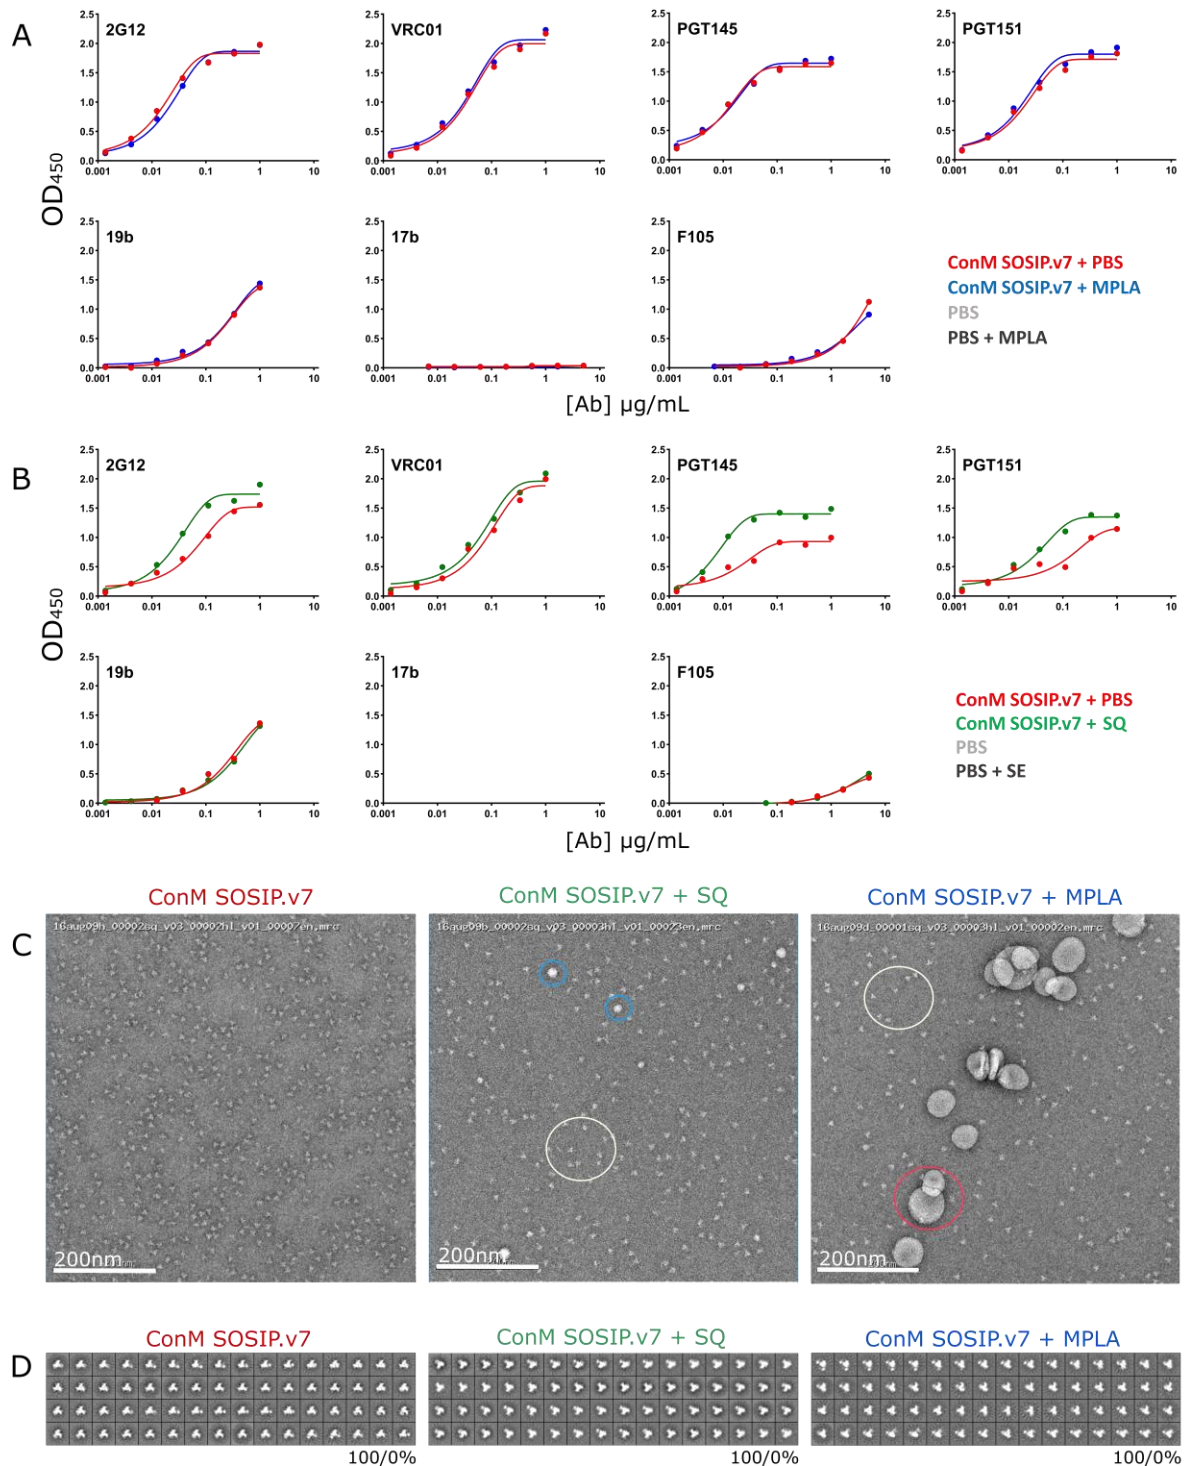

**Figure S1. Formulation of ConM SOSIP.v7 with MPLA and SQ adjuvants (related to figure 2).** D7324-tagged ConM SOSIP.v7 was incubated with the corresponding adjuvant for 1 h at 37°C and the antigenicity (**A**, **B**) and morphology (**C**, **D**) were subsequently assessed by D7324-capture ELISA and negative-stain electron microscopy, respectively. (**C**) Electron micrographs of ConM SOSIP.v7 plus adjuvants; White, blue and red circles identified respectively trimers, Squalene and MPLA. (**D**) 2D-class averages of ConM SOSIP.v7 proteins in formulations. Percentage of native-like/non-native trimers (see *Materials and Methods*) are listed below each set of class averages.

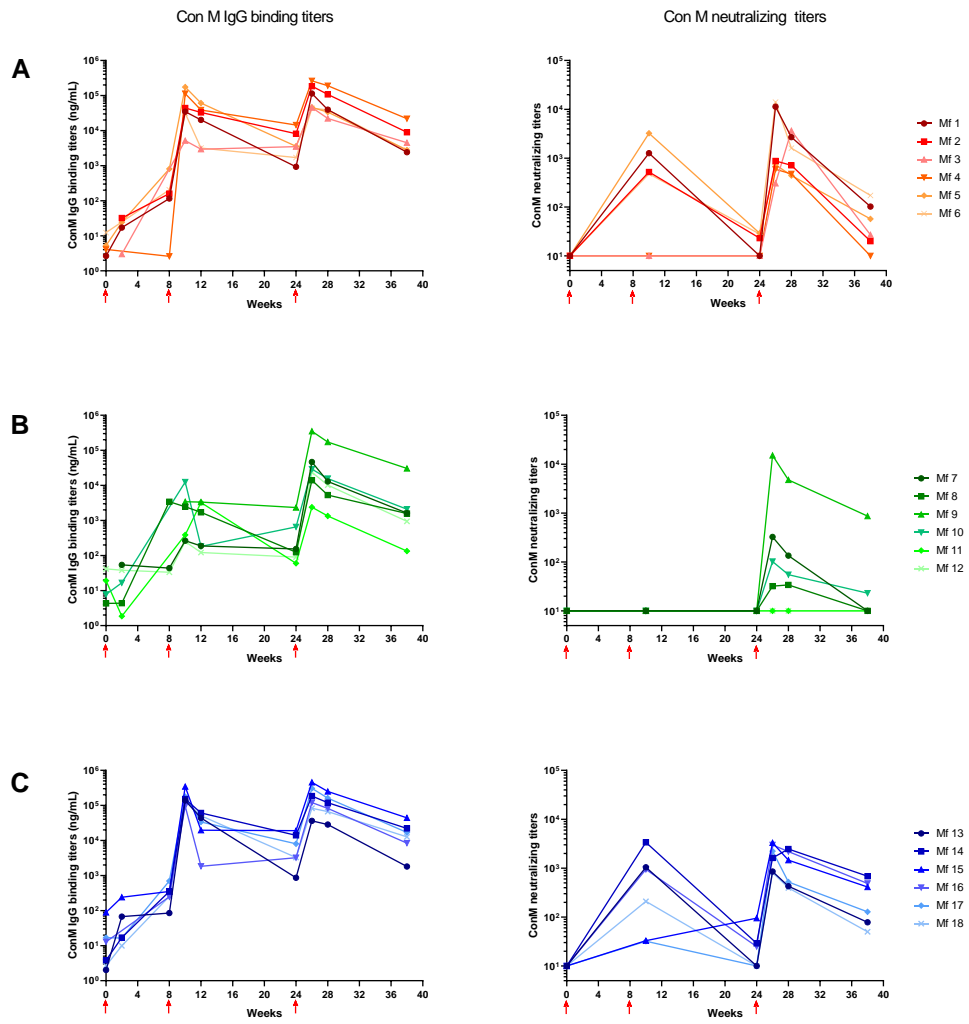

**Figure S2. Individual ConM SOSIP v7 humoral responses (related to figure 2).** ConM IgG binding and neutralizing titers of cynomolgus macaques from the MPLA-IM (A), MPLA-SC (B), and SQ-IM (C) groups, with red, green, and blue shading, respectively. Immunizations (week 0, 8, and 24) are indicated by the red arrows.

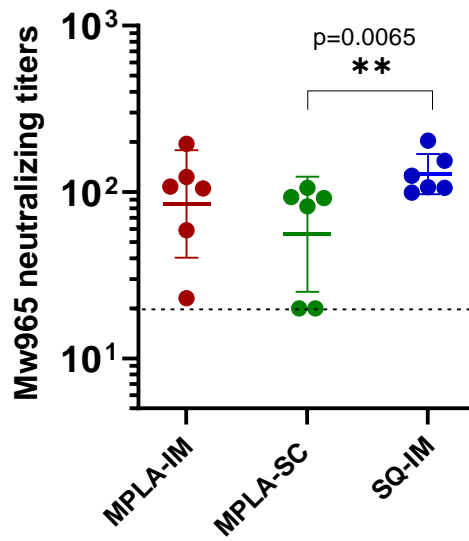

**Figure S3: Heterologous neutralization against MW965 virus (related to figure 2).** MW965 neutralizing titers were measured at week (W)28. Animals from the MPLA-IM group are displayed in red, the MPLA-SC group in green, and the SQ-IM group in blue. The geometric mean and geometric SD are represented. Comparison realized with a Mann-Whitney-Wilcoxon test with p.values < 0.05 are displayed.

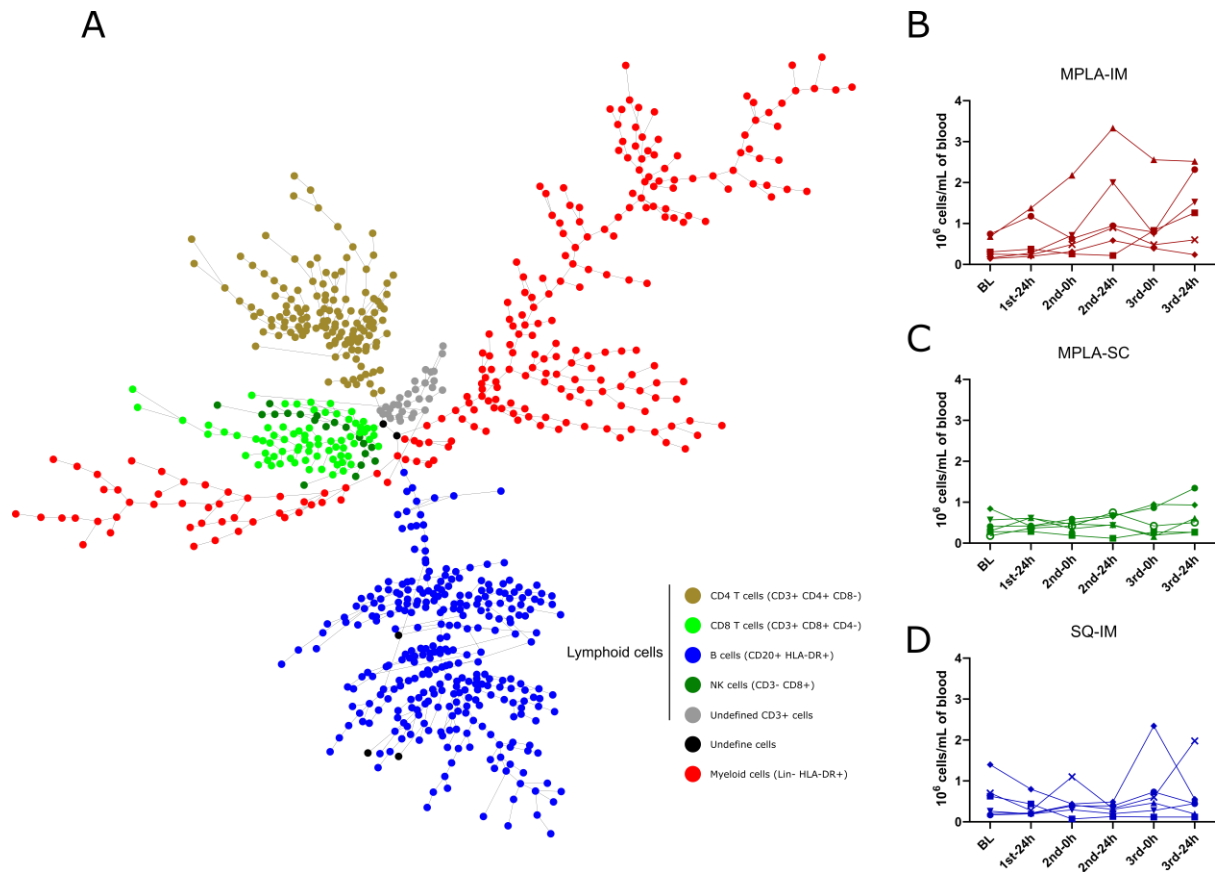

**Figure S4. Identification of major cell populations using the SPADE clustering method following immunizations with SOSIP v7 ConM (related to figure 3).** (A) SPADE tree created using the entire mass cytometry data set. Each dot represents a cell cluster. Major cell populations are annotated according to their phenotype: B cells (CD20<sup>+</sup> HLA-DR<sup>+</sup> CD1c<sup>+</sup>), T cells (CD3<sup>+</sup> CD4<sup>+</sup> or CD8<sup>+</sup>), NK cells (CD3<sup>-</sup> CD8<sup>+</sup>), undefined lymphocytes (CD3<sup>+</sup> CD4<sup>-</sup> CD8<sup>low/-</sup>), and undefined cells. All remaining cell clusters are considered to be myeloid cells. Phenotypically similar clusters were linked using a minimal spanning-tree approach of the SPADE algorithm. Kinetics of the myeloid cells compartment depending on the vaccine: (B) MPLA-IM, (C) MPLA-SC and (D) SQ-IM.

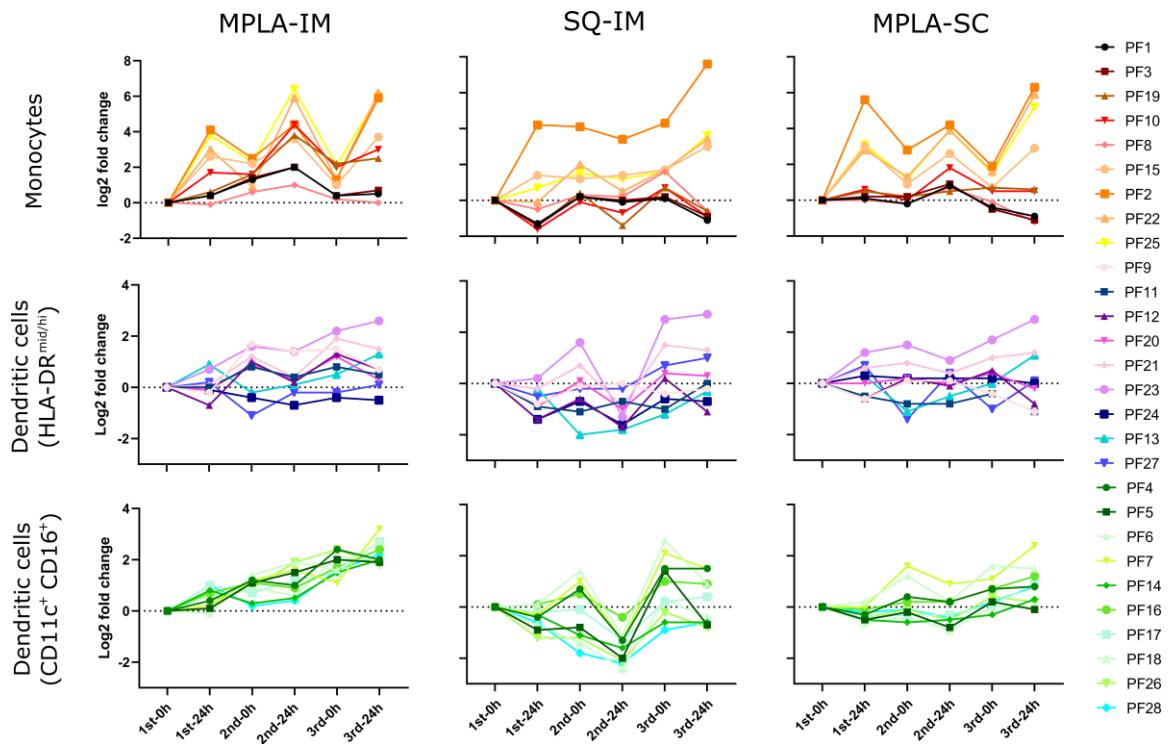

**Figure S5. Variation of phenotypic families following immunization (related to figure 4).** Mean log<sub>2</sub> fold changes relative to the baseline values are displayed for each superfamily. Each color is assigned to a phenotypic family according to the colors defined in the heatmap (Fig.3).

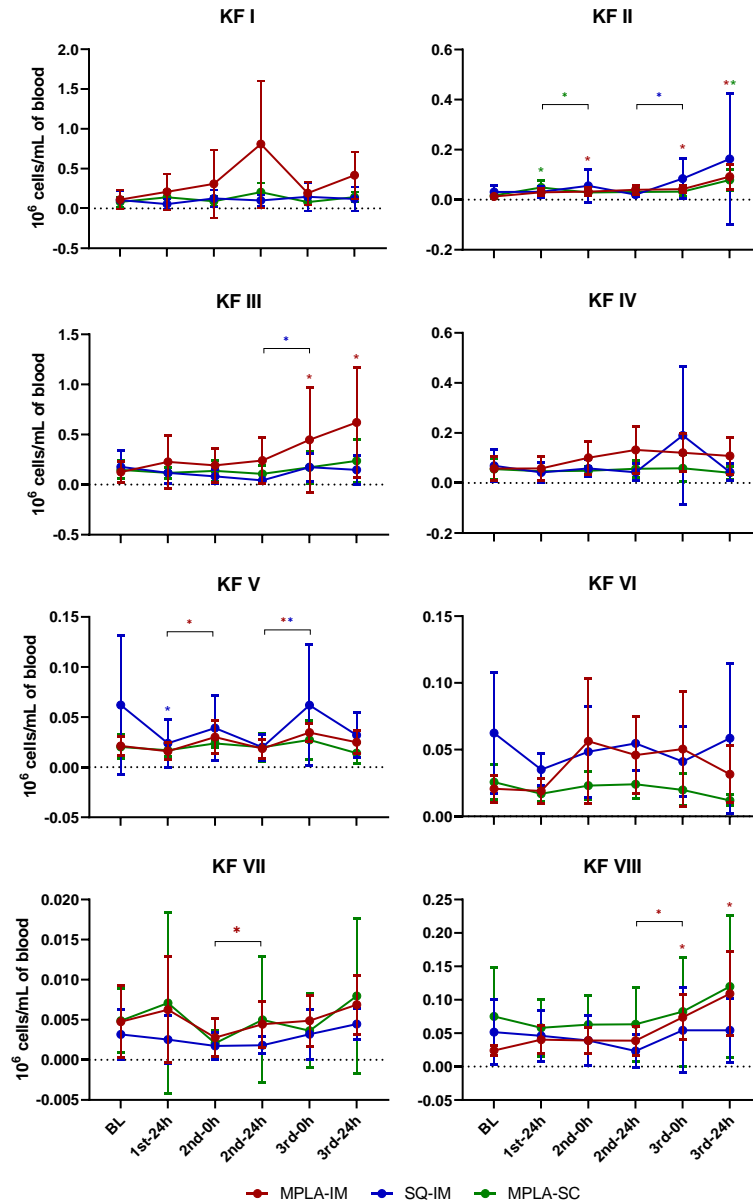

**Figure S6. Dynamics of kinetic families following vaccine injections (related to figure 5).** Phenotypic families were regrouped by similar dynamics to form eight kinetic families. The graphs show the mean cell number per mL of blood for all individuals ( $n=6$ ) for each injection (MPLA-IM in red, MPLA-SC in green, and SQ-IM in blue). Significant differences relative to baseline values are indicated by a star and black lines are used to show significant differences compared to the previous time-point. P-values are shown in [Table S2](#).



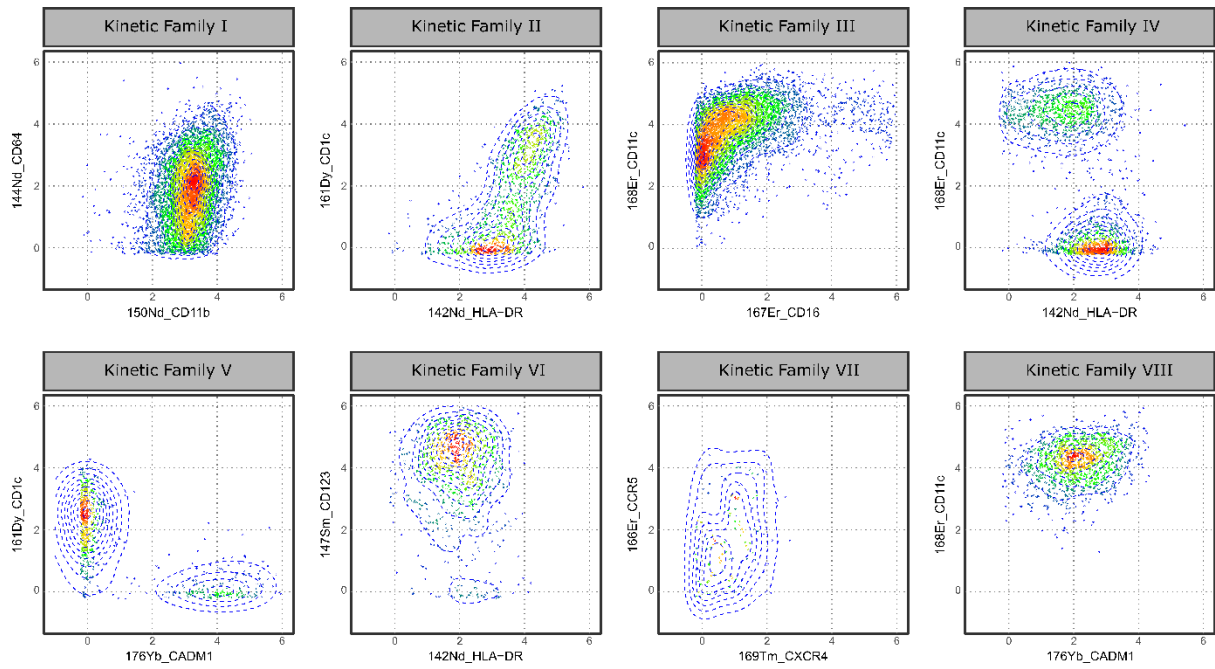

**Figure S7: Main characteristics of kinetic families expression profiles (related to figure 5).** Each dotplot represents the mean signal intensity (MSI) of all cells contained by a kinetic family (KF) without vaccines segregation. Markers are chosen according to the main population characteristics as defined in Table 1.

**Table S1. p-values of differences in cell numbers within phenotypic families (related to figure 4). Comparisons were made using the Mann-Whitney Wilcoxon test. P-values  $\leq 0.05$  are shown in red.**

| Conditions                             |                    | Timepoints        | PF1         | PF3         | PF19        | PF10        | PF8         | PF15        | PF2         | PF22         | PF25         | PF12         | PF23        | PF21        | PF20        | PF9         | PF24        | PF11        | PF27 | PF13 | PF28        | PF17        | PF5         | PF4         | PF26        | PF16 | PF14        | PF6         | PF18        | PF7         |             |             |      |      |      |      |      |
|----------------------------------------|--------------------|-------------------|-------------|-------------|-------------|-------------|-------------|-------------|-------------|--------------|--------------|--------------|-------------|-------------|-------------|-------------|-------------|-------------|------|------|-------------|-------------|-------------|-------------|-------------|------|-------------|-------------|-------------|-------------|-------------|-------------|------|------|------|------|------|
| Comparison between conditions          | MPLA-SC vs SQ-IM   | Baseline          | 0.94        | 0.70        | 0.59        | 0.82        | 0.82        | 0.82        | 0.70        | 0.94         | 0.82         | 0.09         | 0.18        | 0.18        | 0.09        | 0.48        | 0.39        | <b>0.04</b> | 0.31 | 0.18 | 0.94        | 0.82        | 1.00        | 0.70        | 0.48        | 0.39 | 1.00        | 0.94        | 0.70        | 0.82        | 0.39        | 1.00        | 0.94 | 0.70 | 0.82 |      |      |
|                                        |                    | 1st-24h           | 0.18        | 0.13        | 0.24        | <b>0.04</b> | 0.18        | 0.13        | 0.09        | 0.06         | <b>0.03</b>  | <b>0.03</b>  | 0.06        | 1.00        | 0.94        | 0.70        | 0.94        | 0.94        | 0.48 | 0.24 | 0.70        | 0.82        | 0.48        | 0.82        | 0.59        | 0.48 | 0.59        | 0.94        | 1.00        | 0.59        | 0.94        | 1.00        | 0.59 | 0.94 | 1.00 | 0.59 |      |
|                                        |                    | 2nd-0h            | 0.94        | 0.94        | 1.00        | 0.82        | 0.18        | 0.39        | 0.82        | 0.70         | 0.70         | 0.18         | 0.39        | 0.94        | 0.48        | 0.31        | 0.94        | 0.48        | 0.75 | 1.00 | 0.82        | 0.48        | 0.39        | 0.48        | 0.31        | 0.59 | 0.70        | 0.18        | 0.94        | 0.31        | 0.24        | 0.18        | 0.13 | 0.39 | 0.94 | 0.06 |      |
|                                        |                    | 2nd-24h           | 0.48        | 0.18        | 0.24        | <b>0.02</b> | 0.70        | 0.18        | 0.13        | 0.06         | <b>0.02</b>  | <b>0.03</b>  | 0.09        | 0.94        | 0.94        | 0.39        | 0.31        | 0.94        | 0.24 | 0.70 | 0.82        | 0.31        | 0.18        | 0.31        | 0.24        | 0.18 | 0.13        | 0.39        | 0.94        | 0.06        | 0.06        | 0.06        | 0.06 | 0.06 | 0.06 | 0.06 |      |
|                                        |                    | 3rd-0h            | 0.94        | 0.59        | 0.39        | 0.70        | 0.94        | 0.48        | 0.48        | 0.94         | 1.00         | 0.09         | 0.31        | 0.48        | 0.31        | 0.31        | 0.13        | 0.13        | 0.70 | 0.18 | 0.59        | 0.31        | 0.70        | 1.00        | 0.39        | 0.82 | 0.48        | 0.39        | 0.24        | 1.00        | 0.39        | 0.82        | 0.48 | 0.39 | 0.24 | 1.00 |      |
|                                        | 3rd-24h            | 0.82              | 1.00        | 0.18        | 0.13        | 0.48        | 0.82        | 0.59        | <b>0.03</b> | 0.09         | <b>0.00</b>  | <b>0.002</b> | <b>0.03</b> | 0.31        | 0.48        | 0.70        | 0.31        | 0.39        | 0.94 | 1.00 | 0.82        | 0.24        | 0.24        | 0.39        | 0.39        | 0.48 | 0.94        | 0.82        | 0.39        | 0.48        | 0.94        | 0.82        | 0.39 | 0.48 | 0.82 |      |      |
|                                        | SQ-IM vs MPLA-IM   | Baseline          | 1.00        | 0.59        | 0.13        | 0.94        | 0.59        | 0.94        | 1.00        | 0.48         | 0.94         | <b>0.03</b>  | 0.06        | 0.06        | <b>0.03</b> | 0.31        | 0.13        | 0.48        | 0.82 | 0.39 | 0.24        | 0.31        | 0.94        | 0.82        | 0.59        | 0.18 | 0.94        | 0.59        | 0.48        | 0.94        | 0.59        | 0.48        | 0.94 | 1.00 | 0.82 |      |      |
|                                        |                    | 1st-24h           | 0.18        | 0.06        | 0.24        | <b>0.02</b> | 0.18        | 0.06        | 0.24        | <b>0.009</b> | <b>0.009</b> | <b>0.03</b>  | 0.31        | 0.39        | 0.24        | 0.13        | 0.09        | 0.48        | 0.18 | 0.13 | 0.94        | 0.48        | 1.00        | 0.94        | 0.94        | 0.48 | 0.94        | 0.48        | 0.94        | 1.00        | 0.82        | 0.94        | 1.00 | 0.82 | 0.94 | 1.00 | 0.82 |
|                                        |                    | 2nd-0h            | 0.48        | 0.39        | 0.82        | 0.39        | 0.39        | 1.00        | 0.82        | 0.94         | 0.70         | 0.94         | 1.00        | 1.00        | 0.94        | 0.31        | 0.31        | 0.59        | 0.13 | 0.70 | 0.59        | 0.31        | 0.31        | 0.70        | 0.82        | 0.82 | 0.24        | 0.24        | 0.48        | 0.24        | 0.48        | 0.24        | 0.48 | 0.24 | 0.48 | 0.24 |      |
|                                        |                    | 2nd-24h           | 0.09        | <b>0.03</b> | <b>0.04</b> | 0.06        | 0.06        | <b>0.04</b> | <b>0.03</b> | 0.06         | <b>0.04</b>  | 0.59         | 0.48        | 1.00        | 0.70        | 0.82        | 0.59        | 1.00        | 0.06 | 0.09 | 0.31        | 0.09        | <b>0.04</b> | 0.39        | 0.24        | 0.18 | 0.09        | 0.31        | 0.24        | 0.13        | 0.31        | 0.13        | 0.31 | 0.13 | 0.31 | 0.13 |      |
|                                        |                    | 3rd-0h            | 0.06        | 0.06        | 0.06        | <b>0.03</b> | 0.09        | <b>0.03</b> | 0.09        | <b>0.03</b>  | 0.06         | 0.09         | 0.39        | 0.59        | 0.48        | 0.48        | 0.94        | 0.82        | 0.09 | 0.59 | 0.59        | 0.59        | 0.13        | <b>0.04</b> | 0.09        | 0.13 | 0.24        | 0.06        | 0.31        | 0.24        | 0.09        | 0.13        | 0.24 | 0.09 | 0.13 | 0.24 | 0.09 |
|                                        | 3rd-24h            | 0.39              | 0.31        | 1.00        | 0.13        | 0.31        | 0.94        | 0.59        | 0.59        | 0.59         | 0.94         | 0.48         | 0.94        | 0.70        | 0.48        | <b>0.03</b> | 0.39        | 0.18        | 1.00 | 0.70 | 1.00        | 1.00        | 1.00        | 0.94        | 0.18        | 0.59 | 0.09        | 0.70        | 0.94        | 0.09        | 0.70        | 0.94        | 0.09 | 0.70 | 0.94 | 0.09 |      |
|                                        | MPLA-IM vs MPLA-SC | Baseline          | 0.70        | 0.94        | 0.39        | 0.24        | 0.59        | 0.59        | 0.82        | 0.94         | 0.94         | 0.48         | 0.94        | 0.70        | 0.70        | 0.48        | 0.70        | 0.24        | 0.48 | 0.94 | 0.24        | 0.39        | 0.94        | 0.82        | 0.09        | 0.13 | 1.00        | 0.39        | 0.94        | 0.59        | 0.59        | 0.59        | 0.59 | 0.59 | 0.59 |      |      |
|                                        |                    | 1st-24h           | 0.82        | 0.94        | 0.94        | 0.48        | 1.00        | 1.00        | 0.59        | 0.48         | 0.82         | 0.94         | 0.94        | 0.13        | 0.31        | <b>0.03</b> | 0.09        | 0.70        | 0.48 | 1.00 | 0.70        | 0.70        | 0.48        | 0.94        | 0.48        | 0.39 | 0.48        | 0.94        | 0.48        | 0.94        | 0.48        | 0.94        | 0.48 | 0.94 | 1.00 | 0.82 |      |
|                                        |                    | 2nd-0h            | 0.31        | 0.13        | 0.94        | 0.39        | <b>0.02</b> | 0.24        | 0.59        | 0.48         | 0.39         | 0.18         | 0.18        | 0.94        | 0.59        | 0.82        | 0.24        | 0.39        | 0.59 | 0.59 | 0.82        | 0.94        | 0.70        | 0.24        | 0.82        | 0.48 | 0.94        | 0.39        | 0.94        | 0.48        | 0.94        | 0.39        | 0.94 | 0.48 | 0.94 | 0.39 | 0.94 |
| 2nd-24h                                |                    | 0.18              | 0.31        | 0.31        | 0.09        | 0.09        | 0.06        | 0.18        | 0.09        | 0.09         | 0.13         | 0.59         | 0.82        | 0.94        | 0.39        | 0.82        | 0.70        | 0.48        | 0.31 | 0.59 | 0.59        | 0.39        | 0.82        | 0.82        | 0.59        | 0.39 | 0.70        | 0.59        | 0.48        | 0.94        | 0.70        | 0.59        | 0.48 | 0.94 | 0.70 | 0.59 |      |
| 3rd-0h                                 |                    | 0.24              | <b>0.00</b> | 0.09        | 0.09        | <b>0.04</b> | 0.13        | 1.00        | 0.24        | 0.13         | 0.06         | 0.59         | 0.70        | 0.31        | 0.59        | 0.94        | 0.06        | 0.48        | 0.18 | 0.48 | 0.18        | 0.48        | 0.13        | 0.18        | 0.48        | 0.48 | 0.82        | 0.18        | 0.18        | 0.24        | 0.31        | 0.24        | 0.31 | 0.24 | 0.31 |      |      |
| 3rd-24h                                | <b>0.04</b>        | 0.06              | 0.39        | 0.09        | <b>0.04</b> | 0.06        | 0.59        | 0.94        | 0.82        | 0.31         | 0.13         | <b>0.06</b>  | <b>0.48</b> | <b>0.82</b> | <b>0.70</b> | 0.70        | 0.70        | 0.39        | 0.31 | 0.18 | 0.70        | 0.31        | 0.18        | 0.70        | 0.31        | 0.82 | 0.94        | 0.18        | 0.31        | 0.24        | 0.24        | 0.24        | 0.24 |      |      |      |      |
| Comparison with the previous timepoint | MPLA-IM            | 2nd-0h vs 1st-24h | 0.22        | 0.09        | 0.31        | 0.84        | 0.09        | 0.22        | 0.06        | 0.09         | 0.06         | <b>0.03</b>  | 0.31        | <b>0.03</b> | <b>0.03</b> | <b>0.03</b> | 0.09        | 0.31        | 0.31 | 0.06 | 0.31        | 0.06        | 0.16        | <b>0.03</b> | <b>0.03</b> | 0.84 | 0.22        | 1.00        | 0.44        | 0.22        | 0.56        |             |      |      |      |      |      |
|                                        |                    | 2nd-24h vs 2nd-0h | <b>0.03</b> | <b>0.03</b> | 0.06        | 0.06        | 0.09        | <b>0.03</b> | <b>0.03</b> | 0.06         | <b>0.03</b>  | 0.06         | <b>0.03</b> | 0.31        | <b>0.03</b> | 0.16        | 0.09        | 0.69        | 0.69 | 0.06 | <b>0.03</b> | 0.09        | 0.16        | <b>0.03</b> | 0.84        | 1.00 | 0.22        | 0.44        | 0.44        | <b>0.03</b> | 0.31        | 0.16        |      |      |      |      |      |
|                                        |                    | 3rd-0h vs 2nd-24h | <b>0.03</b> | <b>0.03</b> | 0.22        | 0.06        | 0.22        | 0.06        | 0.06        | 0.06         | 0.06         | 0.69         | 0.69        | <b>0.03</b> | 0.09        | 0.06        | 0.31        | 1.00        | 0.69 | 1.00 | <b>0.03</b> | 0.22        | 1.00        | 0.69        | 0.06        | 0.16 | 0.44        | <b>0.03</b> | 0.31        | <b>0.03</b> | 0.31        | <b>0.03</b> |      |      |      |      |      |
|                                        |                    | 3rd-24h vs 3rd-0h | 1.00        | 0.44        | 1.00        | 1.00        | 0.69        | <b>0.03</b> | <b>0.03</b> | <b>0.03</b>  | <b>0.03</b>  | <b>0.03</b>  | 0.31        | 0.84        | 0.06        | 0.06        | 0.56        | 0.44        | 0.69 | 0.06 | 0.31        | 0.84        | 0.06        | 0.16        | 0.31        | 0.84 | 0.06        | 0.16        | 0.31        | 0.06        | 0.44        | 0.84        | 0.16 |      |      |      |      |
|                                        |                    | 2nd-0h vs 1st-24h | 1.00        | 0.84        | 0.84        | 0.31        | 0.69        | <b>0.03</b> | <b>0.03</b> | 0.44         | 0.09         | 0.16         | 0.56        | <b>0.03</b> | 0.44        | 0.84        | 0.31        | 0.69        | 0.44 | 0.09 | 0.16        | 0.16        | 0.09        | <b>0.03</b> | 0.84        | 0.22 | 0.56        | 0.84        | 0.84        | 0.84        | 0.84        | 0.84        | 0.84 | 0.84 | 0.84 |      |      |
|                                        | MPLA-SC            | 2nd-24h vs 2nd-0h | 0.16        | 0.16        | 0.84        | <b>0.03</b> | 0.16        | <b>0.03</b> | 0.16        | <b>0.03</b>  | <b>0.03</b>  | 0.69         | 1.00        | 0.56        | 0.56        | 0.31        | 0.22        | 1.00        | 0.31 | 0.06 | 0.44        | 0.22        | 0.22        | 0.22        | 1.00        | 0.84 | 1.00        | 0.16        | 0.44        | 0.31        | 0.31        | 0.31        | 0.31 |      |      |      |      |
|                                        |                    | 3rd-0h vs 2nd-24h | 0.09        | 0.06        | 0.84        | 0.16        | 0.09        | <b>0.03</b> | 0.06        | 0.06         | <b>0.03</b>  | 0.56         | 0.84        | 0.44        | 0.84        | 0.44        | 0.31        | 1.00        | 0.44 | 0.31 | 0.09        | 0.09        | 0.16        | 0.22        | 0.22        | 0.22 | 0.44        | 0.44        | 0.09        | 0.31        | 0.31        | 0.31        | 0.31 |      |      |      |      |
|                                        |                    | 3rd-24h vs 3rd-0h | 0.22        | 0.44        | 0.84        | 1.00        | 0.09        | <b>0.03</b> | <b>0.03</b> | <b>0.03</b>  | <b>0.03</b>  | <b>0.03</b>  | 1.00        | 0.09        | 0.84        | 1.00        | 0.31        | 1.00        | 0.09 | 0.16 | 1.00        | 0.69        | 1.00        | <b>0.03</b> | 0.16        | 0.16 | 0.06        | 0.84        | 0.56        | 0.06        | 0.84        | 0.56        | 0.06 |      |      |      |      |
|                                        |                    | 2nd-0h vs 1st-24h | 0.09        | 0.06        | 0.06        | 0.06        | 0.44        | 0.56        | 0.84        | <b>0.03</b>  | 0.44         | 0.44         | 1.00        | 0.44        | 0.44        | 0.44        | 0.44        | 0.69        | 0.06 | 0.84 | 0.84        | 0.84        | 0.56        | 0.69        | 0.56        | 0.84 | 0.84        | 0.56        | 0.69        | 0.56        | 0.69        | 0.56        | 0.69 |      |      |      |      |
|                                        |                    | 2nd-24h vs 2nd-0h | 0.84        | 0.84        | 0.16        | 0.31        | 0.69        | 0.84        | 0.56        | 0.44         | 0.56         | 0.56         | 0.09        | 0.06        | 0.16        | <b>0.03</b> | 0.03        | 0.22        | 0.44 | 0.84 | 0.06        | 0.16        | 0.16        | 0.16        | 0.16        | 0.16 | 0.31        | 0.06        | 0.16        | 0.31        | 0.06        | 0.16        | 0.44 | 0.22 |      |      |      |
|                                        | SQ-IM              | 3rd-0h vs 2nd-24h | 1.00        | 0.84        | 0.06        | 0.06        | 0.84        | 1.00        | 1.00        | 0.44         | 0.44         | 0.31         | 0.44        | <b>0.03</b> | 0.06        | 0.03        | <b>0.03</b> | 0.16        | 0.56 | 1.00 | <b>0.03</b> | <b>0.03</b> | <b>0.03</b> | 0.09        | 0.09        | 0.06 | 0.06        | <b>0.03</b> | <b>0.03</b> | 0.06        | <b>0.03</b> | <b>0.03</b> | 0.06 | 0.06 |      |      |      |
|                                        |                    | 3rd-24h vs 3rd-0h | 0.09        | 1.00        | 0.16        | <b>0.03</b> | 0.06        | 0.31        | <b>0.03</b> | 0.31         | 0.22         | 0.69         | 0.31        | 0.16        | 0.69        | 0.84        | 0.44        | 0.69        | 0.22 | 0.69 | 1.00        | 0.16        | 0.44        | 1.00        | 1.00        | 0.84 | 0.69        | 0.56        | 0.44        | 1.00        | 0.84        | 0.69        | 0.56 | 0.44 | 1.00 |      |      |
|                                        |                    | 1st-24h           | 0.44        | 0.44        | <b>0.03</b> | <b>0.03</b> | 0.84        | <b>0.03</b> | <b>0.03</b> | <b>0.03</b>  | <b>0.03</b>  | <b>0.03</b>  | 0.31        | 1.00        | 0.06        | 0.56        | 1.00        | 0.06        | 1.00 | 0.44 | 0.69        | <b>0.03</b> | 0.69        | 0.84        | 0.56        | 0.44 | <b>0.03</b> | <b>0.03</b> | 0.84        | 0.44        | 0.44        | 0.44        | 0.44 | 0.44 |      |      |      |
|                                        |                    | 2nd-0h            | 0.16        | 0.09        | 0.16        | 0.16        | 0.22        | 0.16        | <b>0.03</b> | 0.31         | 0.09         | 0.06         | 0.44        | 0.09        | 0.09        | <b>0.03</b> | <b>0.03</b> | 0.16        | 0.22 | 0.06 | 0.03        | 0.22        | 0.06        | 0.06        | 0.06        | 0.69 | <b>0.03</b> | 0.22        | 0.09        | 0.44        | 1.00        | 0.31        | 0.31 | 0.31 |      |      |      |
|                                        |                    | 2nd-24h           | 0.06        | 0.06        | 0.06        | <b>0.03</b> | 0.09        | <b>0.03</b> | <b>0.03</b> | 0.06         | <b>0.03</b>  | 0.06         | <b>0.03</b> | 0.06        | 0.84        | 1.00        | 0.69        | 0.56        | 0.06 | 0.22 | 0.84        | 0.8         |             |             |             |      |             |             |             |             |             |             |      |      |      |      |      |

**Table S2. p-values of differences in cell number between kinetic families (related to figure 5).** Comparisons were made using the Mann-Whitney Wilcoxon test. P-values  $\leq 0.05$  are shown in red.

|                                        | Conditions         | Timepoint         | KF I         | KF II        | KF III       | KF IV        | KF V         | KF VI        | KF VII       | KF VIII      |
|----------------------------------------|--------------------|-------------------|--------------|--------------|--------------|--------------|--------------|--------------|--------------|--------------|
| Comparison between conditions          | MPLA-SC vs SQ-IM   | Baseline          | 0.937        | 0.240        | 0.937        | 0.937        | 0.132        | 0.132        | 0.180        | 0.589        |
|                                        |                    | 1st-24h           | <b>0.041</b> | 0.394        | 0.485        | 0.132        | 0.937        | <b>0.009</b> | 0.485        | 0.394        |
|                                        |                    | 2nd-0h            | 0.699        | 0.589        | 0.240        | 0.589        | 0.485        | 0.065        | 0.589        | 0.394        |
|                                        |                    | 2nd-24h           | 0.065        | 0.132        | 0.240        | 0.699        | 0.937        | <b>0.026</b> | 0.699        | 0.240        |
|                                        |                    | 3rd-0h            | 0.937        | 0.180        | 0.485        | 0.485        | 0.394        | 0.132        | 0.589        | 0.485        |
|                                        | 3rd-24h            | 0.310             | 0.818        | 0.394        | 0.937        | 0.132        | <b>0.004</b> | 0.589        | 0.240        |              |
|                                        | MPLA-IM vs SQ-IM   | Baseline          | 0.937        | 0.240        | 0.699        | 0.937        | 0.132        | <b>0.015</b> | 0.699        | 0.394        |
|                                        |                    | 1st-24h           | <b>0.041</b> | 1.000        | 0.937        | 0.485        | 1.000        | <b>0.041</b> | 0.093        | 0.699        |
|                                        |                    | 2nd-0h            | 0.589        | 0.699        | 0.485        | 0.310        | 0.818        | 0.937        | 0.394        | 0.699        |
|                                        |                    | 2nd-24h           | <b>0.026</b> | 0.065        | 0.132        | <b>0.041</b> | 1.000        | 0.485        | 0.065        | 0.180        |
|                                        |                    | 3rd-0h            | 0.485        | 0.310        | 0.394        | 0.699        | 0.818        | 1.000        | 0.394        | 0.310        |
|                                        | 3rd-24h            | 0.065             | 0.699        | 0.065        | 0.093        | 0.818        | 0.589        | 0.180        | 0.180        |              |
|                                        | MPLA-IM vs MPLA-SC | Baseline          | 0.818        | 0.485        | 0.699        | 1.000        | 0.589        | 0.485        | 0.818        | 0.132        |
|                                        |                    | 1st-24h           | 0.937        | 0.240        | 1.000        | 0.589        | 0.699        | 0.699        | 0.589        | 0.589        |
|                                        |                    | 2nd-0h            | 0.132        | 0.937        | 0.818        | 0.093        | 0.937        | 0.093        | 0.937        | 0.394        |
| 2nd-24h                                |                    | 0.093             | 0.240        | 0.485        | 0.132        | 0.818        | 0.132        | 0.310        | 0.699        |              |
| 3rd-0h                                 |                    | <b>0.041</b>      | 0.394        | 0.310        | 0.093        | 0.818        | 0.132        | 0.240        | 0.937        |              |
| 3rd-24h                                | 0.132              | 0.699             | 0.310        | 0.093        | 0.132        | 0.240        | 0.589        | 1.000        |              |              |
| Comparison with the previous timepoint | MPLA-IM            | 2nd-0h vs 1st-24h | 0.313        | 0.688        | 1.000        | 0.156        | <b>0.031</b> | 0.063        | 0.156        | 1.000        |
|                                        |                    | 2nd-24h vs 2nd-0h | <b>0.031</b> | 0.438        | 0.219        | 0.156        | 0.063        | 0.313        | <b>0.031</b> | 1.000        |
|                                        |                    | 3rd-0h vs 2nd-24h | 0.063        | 0.563        | 0.156        | 0.688        | <b>0.031</b> | 1.000        | 0.844        | <b>0.031</b> |
|                                        |                    | 3rd-24h vs 3rd-0h | 0.063        | 0.063        | 0.563        | 0.219        | 0.063        | 0.563        | 0.063        | 0.219        |
|                                        | MPLA-SC            | 2nd-0h vs 1st-24h | 0.219        | <b>0.031</b> | 0.844        | 0.844        | 0.094        | 0.094        | 0.219        | 0.313        |
|                                        |                    | 2nd-24h vs 2nd-0h | <b>0.031</b> | 0.844        | 0.219        | 0.438        | 0.688        | 1.000        | 0.313        | 1.000        |
|                                        |                    | 3rd-0h vs 2nd-24h | 0.063        | 0.688        | 0.313        | 1.000        | 0.313        | 0.563        | 0.688        | 0.313        |
|                                        |                    | 3rd-24h vs 3rd-0h | 0.063        | 0.063        | 0.094        | 0.313        | 0.094        | 0.063        | 0.156        | 0.094        |
|                                        | SQ-IM              | 2nd-0h vs 1st-24h | 0.156        | 0.438        | 1.000        | 0.563        | 0.438        | 0.563        | 0.688        | 0.563        |
|                                        |                    | 2nd-24h vs 2nd-0h | 1.000        | 0.063        | 0.156        | 0.438        | 0.063        | 0.438        | 0.688        | 0.094        |
|                                        |                    | 3rd-0h vs 2nd-24h | 0.844        | <b>0.031</b> | <b>0.031</b> | 0.063        | <b>0.031</b> | 0.438        | 0.563        | 0.063        |
|                                        |                    | 3rd-24h vs 3rd-0h | 0.563        | 0.844        | 0.688        | 0.156        | 0.563        | 1.000        | 0.313        | 0.844        |
| Comparison with baseline               | MPLA-IM            | 1st-24h           | <b>0.031</b> | 0.063        | 0.313        | 0.844        | 0.219        | 0.219        | 0.438        | 0.156        |
|                                        |                    | 2nd-0h            | 0.156        | <b>0.031</b> | 0.219        | 0.219        | 0.688        | 0.094        | 0.063        | 0.156        |
|                                        |                    | 2nd-24h           | <b>0.031</b> | 0.063        | 0.219        | 0.156        | 0.438        | 0.156        | 0.844        | 0.313        |
|                                        |                    | 3rd-0h            | 0.063        | <b>0.031</b> | <b>0.031</b> | 0.156        | 0.063        | 0.156        | 0.844        | <b>0.031</b> |
|                                        |                    | 3rd-24h           | <b>0.031</b> | <b>0.031</b> | <b>0.031</b> | 0.438        | 0.688        | 0.438        | 0.219        | <b>0.031</b> |
|                                        | MPLA-SC            | 1st-24h           | 0.219        | <b>0.031</b> | 0.688        | 0.844        | 0.844        | 0.313        | 1.000        | 1.000        |
|                                        |                    | 2nd-0h            | 1.000        | 0.156        | 0.688        | 0.844        | 0.563        | 1.000        | 0.094        | 1.000        |
|                                        |                    | 2nd-24h           | 0.094        | 0.156        | 0.438        | 0.844        | 0.844        | 1.000        | 0.563        | 0.563        |
|                                        |                    | 3rd-0h            | 0.688        | 0.438        | 0.844        | 0.844        | 0.313        | 0.688        | 0.313        | 0.844        |
|                                        | 3rd-24h            | 0.219             | <b>0.031</b> | 0.313        | 0.563        | 0.219        | 0.063        | 0.438        | 0.156        |              |
|                                        | SQ-IM              | 1st-24h           | 0.063        | 0.563        | 0.063        | 0.063        | <b>0.031</b> | 0.219        | 0.313        | 0.438        |
|                                        |                    | 2nd-0h            | 0.688        | 0.438        | 0.563        | 1.000        | 0.844        | 0.313        | 0.438        | 0.563        |
| 2nd-24h                                |                    | 1.000             | 0.563        | 0.063        | 0.313        | 0.063        | 0.844        | 0.313        | 0.219        |              |
| 3rd-0h                                 |                    | 0.313             | 0.063        | 0.688        | 0.219        | 0.844        | 0.156        | 1.000        | 0.844        |              |
| 3rd-24h                                | 1.000              | 0.063             | 1.000        | 0.688        | 0.438        | 1.000        | 0.438        | 0.844        |              |              |

**Table S3. Myeloid panel used for the mass-cytometry experiment (related to STAR Methods section).** The metal and antibody clone associations are shown. Intracellular markers are shown in bold.

| <b>Metal</b>   | <b>Antibody</b> | <b>Clone</b>       |
|----------------|-----------------|--------------------|
| Pr(141)        | CD66abce        | TET2               |
| Nd(142)        | HLA-DR          | L243               |
| Nd(143)        | CD3             | SP34.2             |
| Nd(144)        | CD64            | 10.1               |
| Nd(145)        | CD8             | RPAT8              |
| <b>Nd(146)</b> | <b>IL6</b>      | <b>MQ2.13A5</b>    |
| Sm(147)        | CD123           | 7G3                |
| <b>Nd(148)</b> | <b>IL4</b>      | <b>8D48</b>        |
| Sm(149)        | CD11a           | HI111              |
| Nd(150)        | CD11b           | ICRF144            |
| Eu(151)        | CD62L           | SK11               |
| Sm(152)        | CD4             | L200               |
| Eu(153)        | FceRI           | AER37              |
| Sm(154)        | CD86            | IT2.2              |
| Gd(156)        | CD172a          | 15-414 /<br>REA144 |
| <b>Gd(158)</b> | <b>IP10</b>     | <b>6D4</b>         |
| Tb(159)        | CD45            | D058-1283          |
| <b>Gd(160)</b> | <b>IL1a</b>     | <b>364/3B3</b>     |
| Dy(161)        | CD1c            | AF-5910            |
| <b>Dy(162)</b> | <b>IL-12</b>    | <b>C8.6</b>        |
| Dy(163)        | CD32abc         | FLI8.26            |
| <b>Dy(164)</b> | <b>IFNa</b>     | <b>LT27/295</b>    |
| Ho(165)        | CD39            | eBioA1             |
| Er(166)        | CD195 (CCR5)    | 3A9                |
| Er(167)        | CD16            | 3G8                |
| Er(168)        | CD11c           | 3.9                |
| Tm(169)        | CD184 (CXCR4)   | 12G5               |
| Er(170)        | CD14            | M5E2               |
| <b>Yb(171)</b> | <b>IL8</b>      | <b>6265.8</b>      |
| Yb(172)        | CD23            | 9P25               |
| Yb(173)        | CD141           | 1A4                |
| Yb(174)        | CD20            | 2H7                |
| Lu(175)        | CCR7            | G043H7             |
| Yb(176)        | CADM1           | 3E 1               |

Pr: Praseodymium    Gd: Gadolinium    Er: Erbium  
Nd: Neodymium    Tb: Terbium    Tm: Thulium  
Sm: Samarium    Dy: Dysprosium    Yb: Ytterbium  
Eu: Europium    Ho: Holmium    Lu: Lutecium
